# Supplementary figures and images for: FABP7 expression in normal and stab-injured brain cortex and its role in astrocyte proliferation
Source: PubMed Central journal article supplement — Histochem Cell Biol. 2011 Sep 22;136(5):501–13. doi: 10.1007/s00418-011-0865-4 (PMC3192944; doi:10.1007/s00418-011-0865-4), 2011-09-22

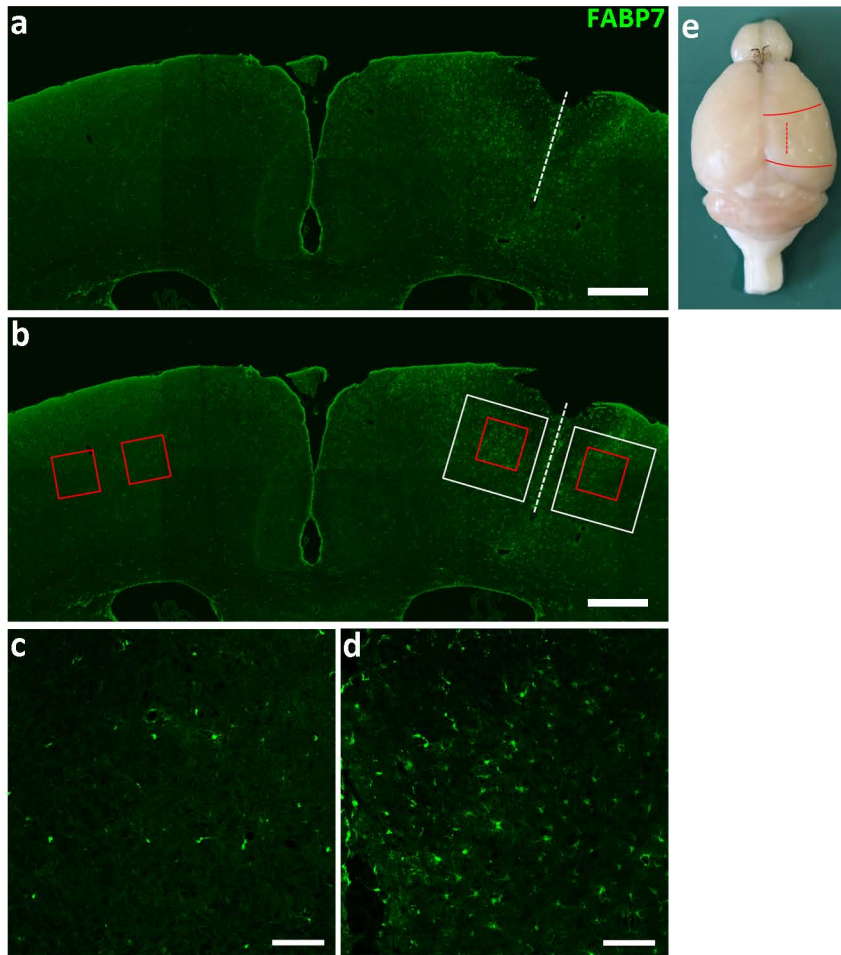

**Supplementary Fig. 1**

Supplement: 418_2011_865_MOESM1_ESM.pdf [file 418_2011_865_MOESM1_ESM.pdf]

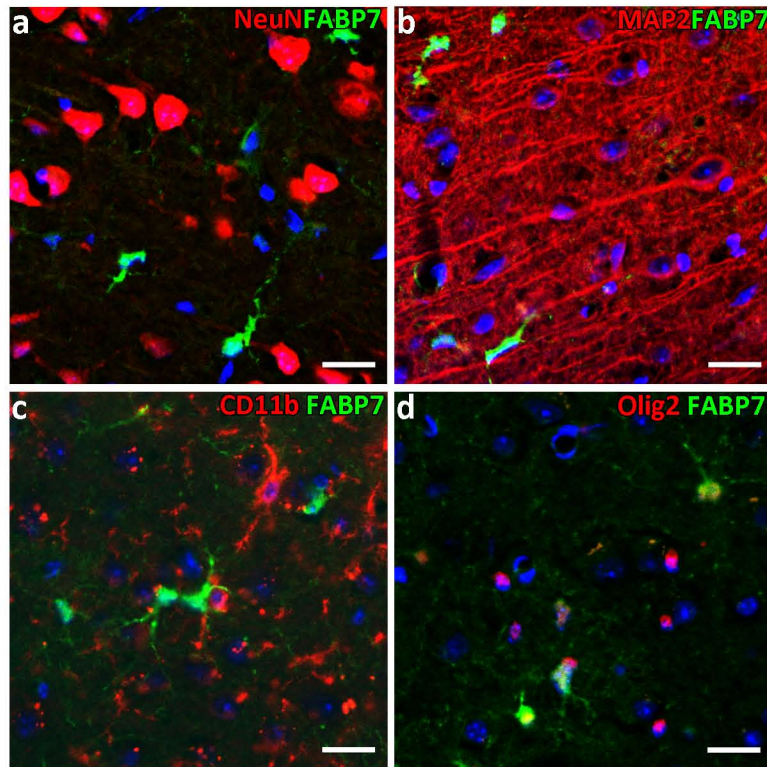

**Supplementary Fig. 2**

Supplement: 418_2011_865_MOESM2_ESM.pdf [file 418_2011_865_MOESM2_ESM.pdf]

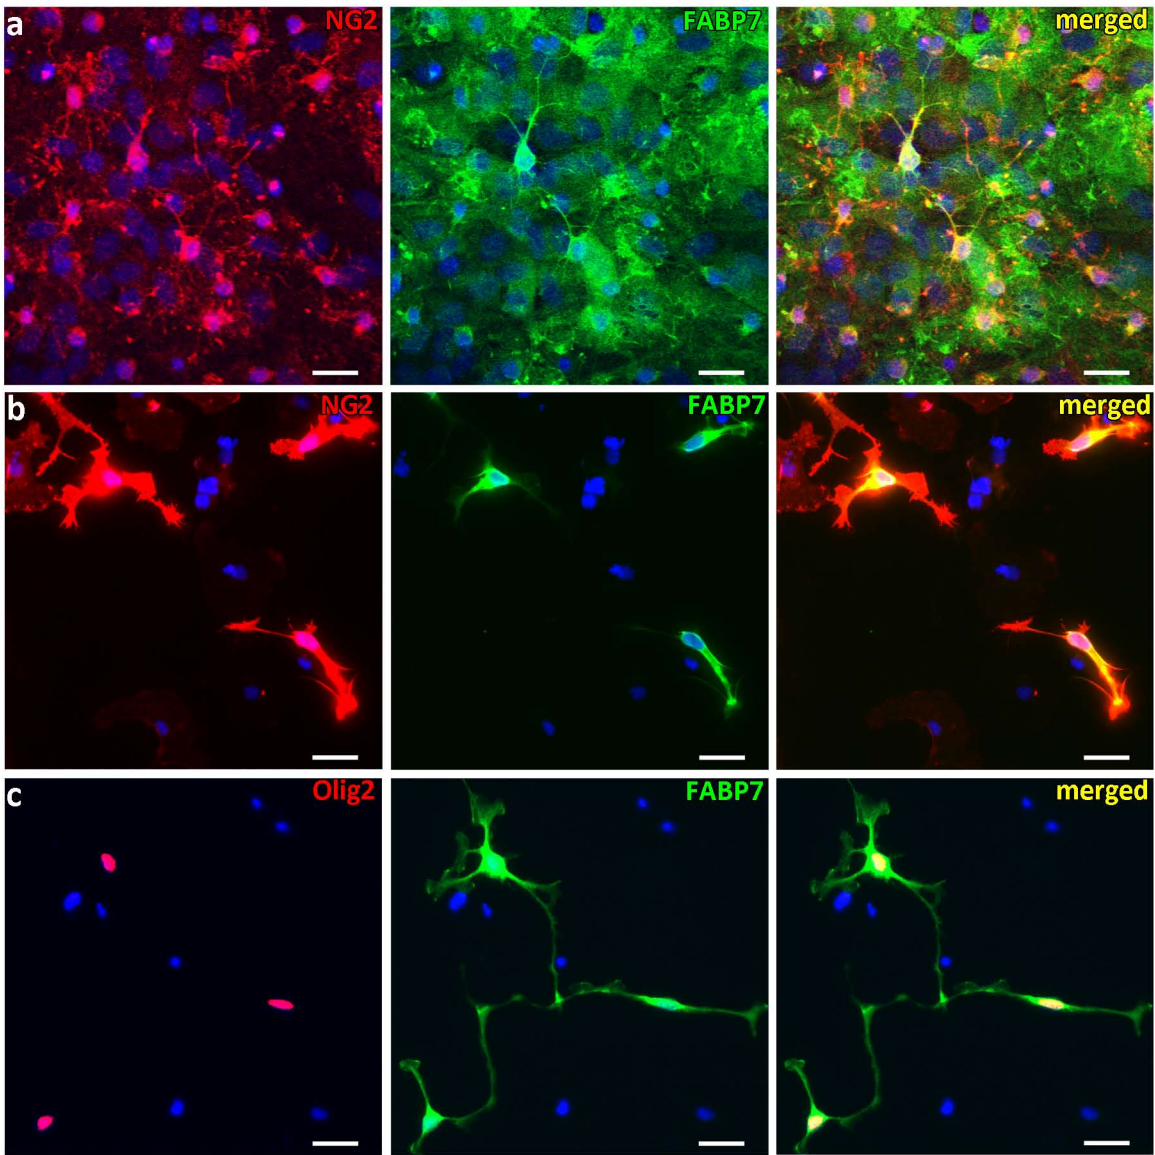

**Supplementary Fig. 3**

Supplement: 418_2011_865_MOESM3_ESM.pdf [file 418_2011_865_MOESM3_ESM.pdf]

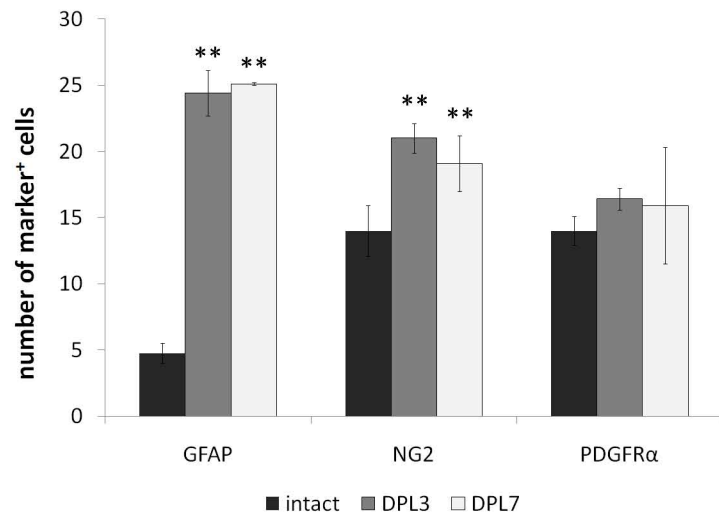

Supplementary Fig. 4

Supplement: 418_2011_865_MOESM4_ESM.pdf [file 418_2011_865_MOESM4_ESM.pdf]

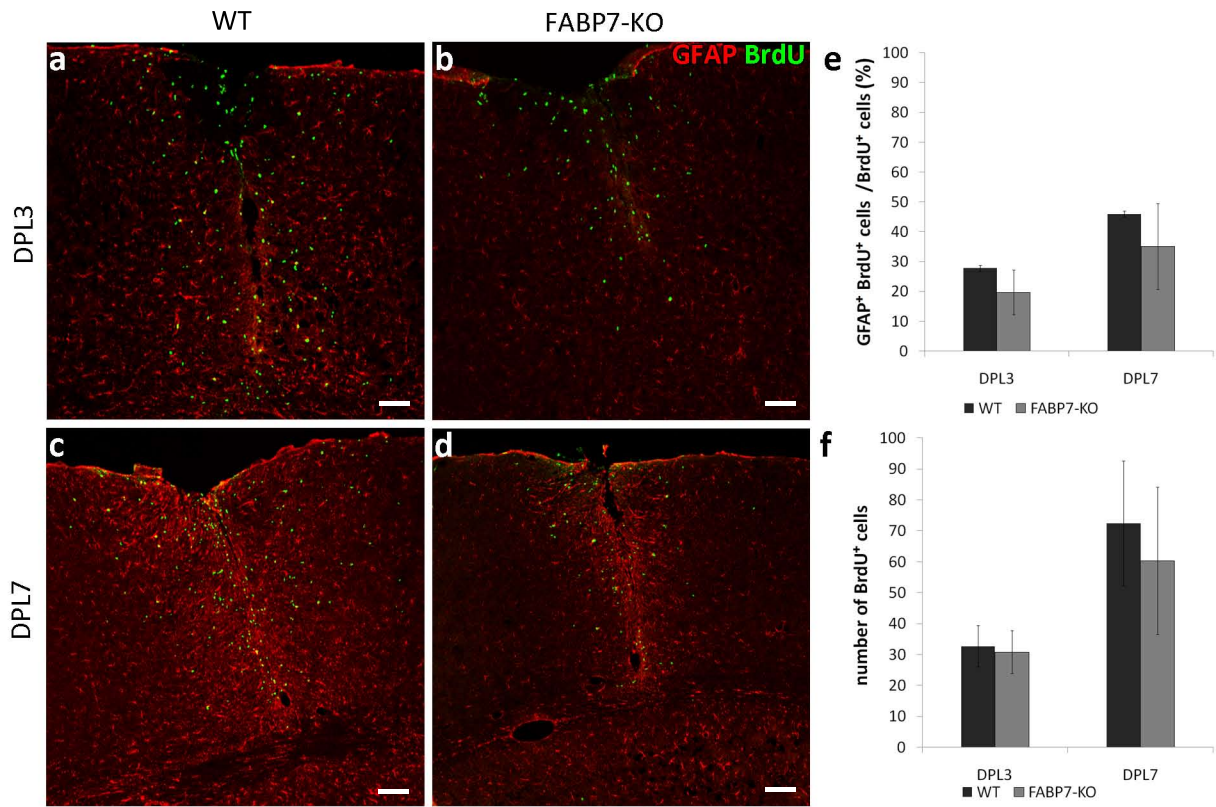

Supplementary Fig. 5

Supplement: 418_2011_865_MOESM5_ESM.pdf [file 418_2011_865_MOESM5_ESM.pdf]
